# Supplementary material
Source: Springer Nature journal article supplement (https://www.springermedizin.de/resource/supplementary/13058_2009_2432_MOESM10_ESM.pdf/9701396)

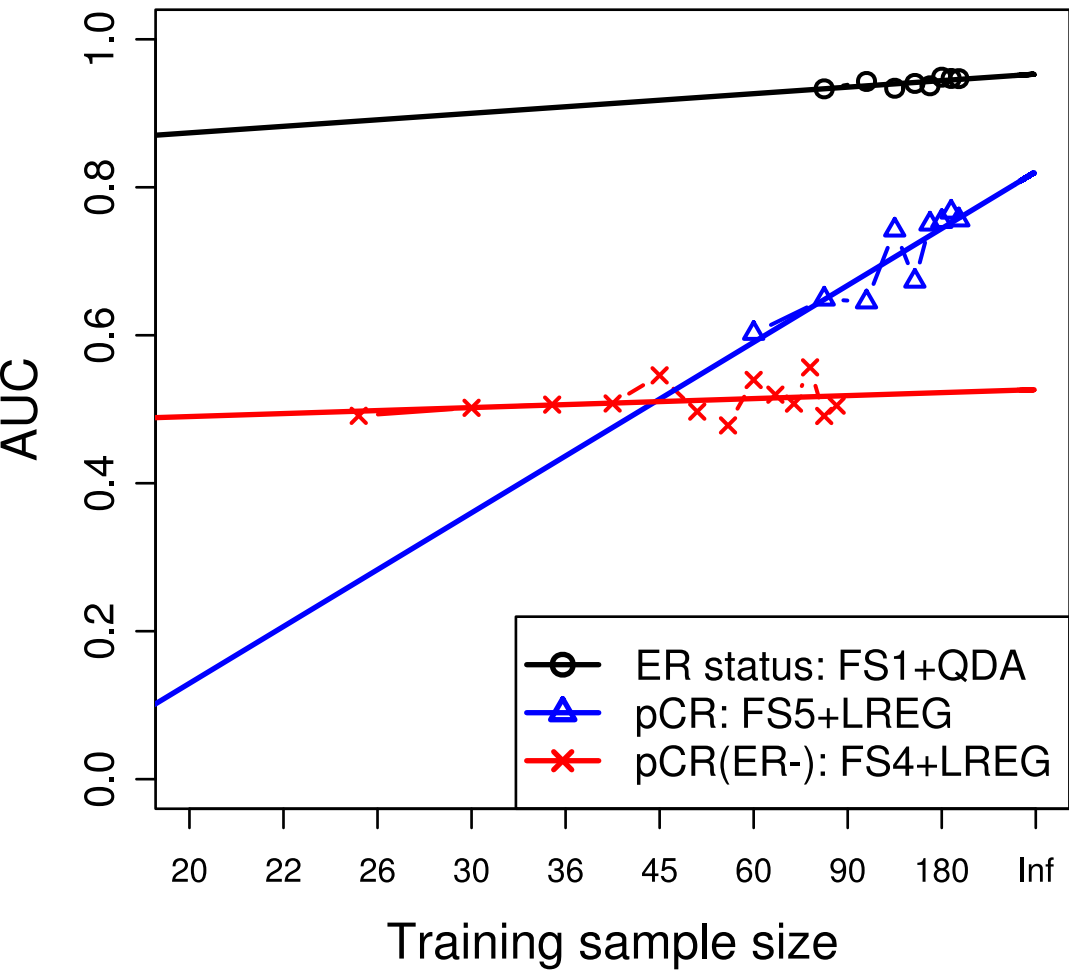

Supplement: MOESM10 [file 9701396]
